# Supplementary material for: Alkaloid and acetogenin-rich fraction from Annona crassiflora fruit peel inhibits proliferation and migration of human liver cancer HepG2 cells
Source: PubMed Central journal article supplement (PMC8266062; doi:10.1371/journal.pone.0250394), 2021-07-08

**A**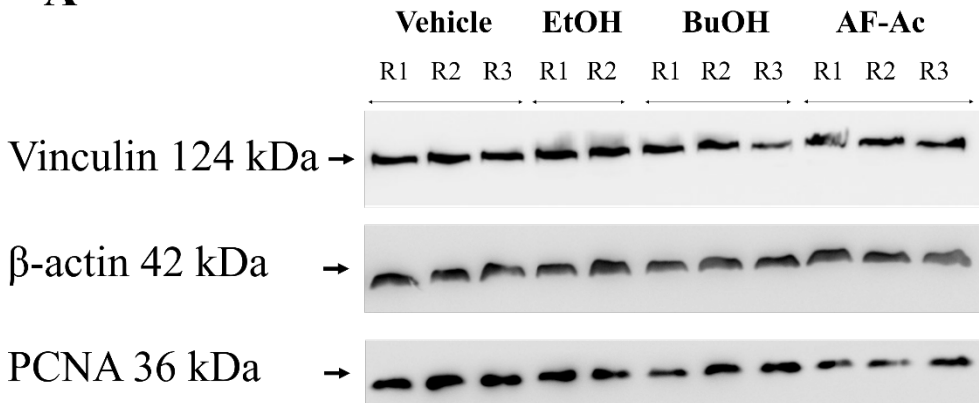**B**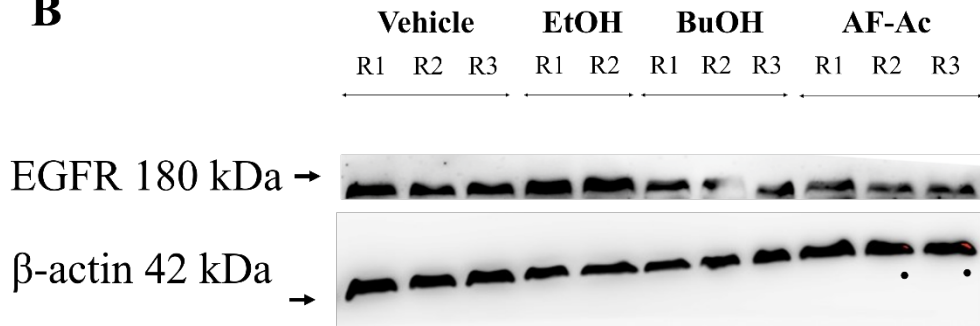

Supplement: pone.0250394.s001.pdf [file pone.0250394.s001.pdf]
